# Supplementary material for: Genomic Analyses Reveal the Common Occurrence and Complexity of Plasmodium vivax Relapses in Cambodia
Source: PubMed Central journal article supplement (PMC5784252; doi:10.1128/mbio.01888-17), 2018-01-23
Supplement: mbo001183678st1.pdf [file mbo001183678st1.pdf]

| Sample | Time | #Read pairs | #Reads to Pv | %Map Pv | Mean Cov | Cov>50X    |
|--------|------|-------------|--------------|---------|----------|------------|
| BL001  | D0   | 182,251,185 | 85,052,857   | 0.23    | 340      | 21,470,547 |
| BL002  | D0   | 119,126,773 | 74,850,388   | 0.31    | 299      | 21,468,797 |
| BL002  | D41  | 59,283,032  | 30,488,465   | 0.26    | 122      | 21,277,399 |
| BL002  | D48  | 54,680,422  | 18,611,047   | 0.17    | 74       | 20,748,410 |
| BL002  | D55  | 57,943,411  | 16,236,946   | 0.14    | 65       | 20,154,194 |
| BL003  | D0   | 79,431,769  | 78,168,245   | 0.49    | 313      | 21,389,523 |
| BL005  | D0   | 172,545,606 | 97,429,477   | 0.28    | 390      | 21,518,719 |
| BL006  | D0   | 121,718,373 | 100,259,252  | 0.41    | 401      | 21,429,996 |
| BL006  | D52  | 55,633,714  | 45,992       | 0.00    | 0        | 0          |
| BL007  | D0   | 70,697,944  | 67,794,119   | 0.48    | 271      | 21,446,114 |
| BL007  | D43  | 49,383,712  | 880,946      | 0.01    | 4        | 1,964      |
| BL007  | D51  | 70,512,473  | 536,632      | 0.00    | 2        | 688        |
| BL007  | D59  | 67,641,383  | 1,746,301    | 0.01    | 7        | 7,105      |
| BL008  | D0   | 10,203,766  | 11,542,471   | 0.57    | 46       | 13,946,644 |
| BL008  | D36R | 93,727,102  | 42,719,038   | 0.23    | 171      | 21,042,297 |
| BL009  | D0   | 166,382,152 | 114,994,939  | 0.35    | 460      | 21,444,419 |
| BL009  | D59  | 56,215,694  | 10,452       | 0.00    | 0        | 101        |
| BL010  | D0   | 69,448,919  | 51,309,417   | 0.37    | 205      | 21,326,291 |
| BL010  | D56R | 111,874,306 | 44,284,531   | 0.20    | 177      | 21,105,486 |
| BL011  | D0   | 143,883,068 | 107,744,952  | 0.37    | 431      | 21,503,585 |
| BL011  | D48R | 50,751,055  | 36,562,822   | 0.36    | 146      | 20,705,930 |
| BL012  | D0   | 99,069,790  | 38,324,980   | 0.19    | 153      | 21,279,386 |
| BL012  | D47R | 146,487,387 | 94,169,754   | 0.32    | 377      | 21,314,108 |
| BL013  | D0   | 58,540,978  | 45,894,245   | 0.39    | 184      | 21,305,729 |
| BL014  | D0   | 58,042,285  | 7,773,758    | 0.07    | 31       | 7,308,680  |
| BL015  | D0   | 73,955,918  | 11,630,105   | 0.08    | 47       | 16,022,007 |
| BL016  | D0   | 200,138,704 | 86,966,005   | 0.22    | 348      | 21,469,631 |
| BL016  | D49  | 54,602,235  | 62,797,962   | 0.58    | 251      | 21,365,981 |
| BL017  | D0   | 90,868,386  | 66,086,084   | 0.36    | 264      | 21,393,447 |
| BL017  | D61  | 90,643,299  | 423,421      | 0.00    | 2        | 4,464      |
| BL018  | D0   | 135,631,849 | 93,470,956   | 0.34    | 374      | 21,299,372 |
| BL018  | D58R | 59,944,874  | 40,736,632   | 0.34    | 163      | 21,369,706 |
| BL019  | D0   | 130,442,923 | 83,577,121   | 0.32    | 334      | 21,436,926 |
| BL020  | D0   | 22,402,713  | 22,374,784   | 0.50    | 89       | 21,141,965 |
| BL022  | D0   | 47,802,303  | 23,755,292   | 0.25    | 95       | 20,875,354 |
| BL023  | D0   | 66,843,976  | 45,107,418   | 0.34    | 180      | 21,090,708 |
| BL023  | D53  | 48,612,297  | 7,936,360    | 0.08    | 32       | 5,048,631  |
